# Supplementary material
Source: PubMed Central journal article supplement (PMC6583687)
Supplement: jama-319-1790-s001.pdf [file jama-319-1790-s001.pdf]

# Premedication Trial for Tracheal Intubation of the NEOnate (PRETTINEO)

A multicenter double blind randomized controlled trial comparing "atropine+propofol" vs "atropine+atracurium+sufentanil" as a premedication prior to endotracheal intubation of the neonate— English Version (translated from the original French version)

**ClinicalTrials.gov Identifier:** NCT01490580

**Sponsor:** Centre Hospitalier Intercommunal de Creteil, 40 avenue de Verdun, 94000 Créteil, France

**Coordinating investigator:** Dr Xavier Durrmeyer, Médecine et réanimation néonatales, Centre Hospitalier Intercommunal de Creteil, 40 avenue de Verdun, 94000 Créteil, France

## Collaborators:

Data management : ACTIV (Association Clinique et Thérapeutique du Val de Marne), Dr Corinne Levy, 27 rue d'Inkermann, 94100 St Maur, France

Monitoring : CRC (Clinical Resaerch Center/Centre de Recherche Clinique), Dr Camille Jung, Centre Hospitalier Intercommunal de Creteil, 40 avenue de Verdun, 94000 Créteil, France

## Participating centers (all in France)

| Center                     | Unit                                 | Principal investigator | Address                                                |
|----------------------------|--------------------------------------|------------------------|--------------------------------------------------------|
| CHI Créteil                | Réanimation Néonatale                | Dr Claude Danan        | 40 avenue de Verdun, 94010, Creteil Cedex 10           |
| CHU Tours                  | Réanimation Pédiatrique et Néonatale | Pr Elie Saliba         | 49, Boulevard Béranger, 37044, Tours Cedex 9           |
| Hôpital mère-enfant - Lyon | Réanimation néonatale                | Pr Olivier Claris      | 59 Bld Pinel, 69677, Bron cedex                        |
| CHU Toulouse               | Réanimation Pédiatrique et Néonatale | Dr Sophie Breinig      | 330 avenue de Grande-Bretagne, 31059, Toulouse Cedex 9 |
| CHU Amiens Nord            | Médecine Néonatale                   | Pr Pierre Tourneux     | 1 place Victor Pauchet, 80054, Amiens Cedex 18         |
| CHU Rennes                 | Unité de néonatalogie                | Pr Alain Beuchee       | 16 boulevard de Bulgarie, 35203, Rennes cedex 2        |
| CHU Caen                   | Réanimation et médecine néonatale    | Dr Cénéric Alexandre   | Avenue de la Côte de Nacre, 14033, Caen Cedex 9        |

|    |                                                                                                       |           |
|----|-------------------------------------------------------------------------------------------------------|-----------|
| 24 |                                                                                                       |           |
| 25 | <b>Premedication Trial for Tracheal Intubation of the NEOnate (PRETTINEO)</b> .....                   | <b>1</b>  |
| 26 | <b>Scientific justification and general description of the research</b> .....                         | <b>4</b>  |
| 27 | Name and description of the experimental drug (s) .....                                               | 4         |
| 28 | Scientific data from the literature .....                                                             | 4         |
| 29 | Predictable benefits and risks known to patients who are eligible for research .....                  | 8         |
| 30 | Description and justification of the route of administration, dosage, administration schedule and     |           |
| 31 | duration of treatment.....                                                                            | 9         |
| 32 | Declaration of compliance with the protocol, good clinical practices and the legal and regulatory     |           |
| 33 | provisions in force .....                                                                             | 10        |
| 34 | Description of the population to be studied .....                                                     | 10        |
| 35 | <b>Purpose and outcomes</b> .....                                                                     | <b>12</b> |
| 36 | Purpose.....                                                                                          | 12        |
| 37 | Hypothesis .....                                                                                      | 12        |
| 38 | Primary outcome.....                                                                                  | 12        |
| 39 | Secondary outcomes .....                                                                              | 12        |
| 40 | <b>Methods</b> .....                                                                                  | <b>13</b> |
| 41 | Trial design .....                                                                                    | 13        |
| 42 | Study proposal and consent from parents .....                                                         | 13        |
| 43 | Data collection .....                                                                                 | 13        |
| 44 | Intervention .....                                                                                    | 14        |
| 45 | Outcomes.....                                                                                         | 18        |
| 46 | Measures to reduce bias.....                                                                          | 19        |
| 47 | <i>Randomization</i> .....                                                                            | 19        |
| 48 | <i>Masking</i> .....                                                                                  | 19        |
| 49 | <i>Dosage and ways of administration of treatments. Unit shape, packaging and labeling</i> .....      | 19        |
| 50 | Duration of participation and follow-up.....                                                          | 20        |
| 51 | Definitive or Temporary Termination Rules .....                                                       | 20        |
| 52 | Treatment kits monitoring .....                                                                       | 20        |
| 53 | Blinding maintenance and unblinding procedure .....                                                   | 20        |
| 54 | Source data.....                                                                                      | 21        |
| 55 | <b>Participants</b> .....                                                                             | <b>21</b> |
| 56 | Inclusion Criteria .....                                                                              | 21        |
| 57 | Non-Inclusion Criteria .....                                                                          | 21        |
| 58 | Procedures for premature termination of treatment administration and for patient's exclusion .....    | 22        |
| 59 | <i>Criteria and procedures for discontinuing treatment and excluding a person from research</i> ..... | 22        |
| 60 | <i>Method and timing of data collection</i> .....                                                     | 22        |
| 61 | <i>Modality for the replacement of excluded patients</i> .....                                        | 22        |
| 62 | <i>Follow-up</i> .....                                                                                | 22        |
| 63 | <b>Treatments given to participants</b> .....                                                         | <b>23</b> |
| 64 | Description of the treatments needed to carry out the research .....                                  | 23        |
| 65 | Medicinal products and treatments authorized and prohibited under the Protocol .....                  | 23        |
| 66 | Method for treatment follow-up and compliance .....                                                   | 23        |
| 67 | Storage conditions of experimental drugs.....                                                         | 23        |
| 68 | <b>Efficacy assessment</b> .....                                                                      | <b>24</b> |
| 69 | Description of Efficacy Assessment Parameters .....                                                   | 24        |

|    |                                                                                              |           |
|----|----------------------------------------------------------------------------------------------|-----------|
| 70 | Method and timeline for measuring, collecting and analyzing efficacy endpoints.....          | 24        |
| 71 | <b>Safety assessment.....</b>                                                                | <b>25</b> |
| 72 | Safety assessment Parameters .....                                                           | 25        |
| 73 | Methods and schedule for AE declaration .....                                                | 26        |
| 74 | Procedures for registration and notification of adverse reactions .....                      | 26        |
| 75 | Follow-up of persons following the occurrence of adverse events .....                        | 26        |
| 76 | <b>Statistics .....</b>                                                                      | <b>27</b> |
| 77 | Statistical methods and timing of intermediate analysis .....                                | 27        |
| 78 | <i>Initial analysis plan (as of September 2011)</i> .....                                    | 27        |
| 79 | <i>Final analysis plan (as of November 2016, established before data was released)</i> ..... | 27        |
| 80 | Sample size .....                                                                            | 28        |
| 81 | Expected statistical significance .....                                                      | 28        |
| 82 | Statistical Criteria for Stopping the Research .....                                         | 29        |
| 83 | Method for taking account of missing, unnecessary or invalid data.....                       | 29        |
| 84 | Management of changes to the initial strategy analysis plan.....                             | 29        |
| 85 | Choice of subjects to include in analyzes .....                                              | 29        |
| 86 | <b>Regulatory and Ethical aspects.....</b>                                                   | <b>29</b> |
| 87 | Right of access to data and source documents .....                                           | 29        |
| 88 | Quality control and quality assurance .....                                                  | 29        |
| 89 | Ethical Considerations .....                                                                 | 29        |
| 90 | National Agency for Numerical Data Safety (CNIL) .....                                       | 30        |
| 91 | Data processing and retention of research documents and data .....                           | 30        |
| 92 | Funding and Insurance .....                                                                  | 31        |
| 93 | Publication rules.....                                                                       | 31        |
| 94 | Feasibility of the study .....                                                               | 31        |
| 95 | <b>References.....</b>                                                                       | <b>33</b> |
| 96 |                                                                                              |           |
| 97 |                                                                                              |           |

## 99 **Scientific justification and general description of the research**

### 100 **Name and description of the experimental drug(s)**

101  
102 Propofol (2,6-diisopropylphenol) is a diisopropylphenol belonging to the class of general  
103 anesthetics. Anesthetic properties are likely mediated by depression of NMDA receptor neuro-  
104 excitatory activity and activation of GABA A receptors <sup>1</sup>.

105 Atropine is a parasympatholytic used in pre-anesthesia as a protection against vagal  
106 manifestations.

107 Sufentanil is a rapid, short-acting synthetic morphine used in anesthesia and resuscitation.

108 Atracurium is a non-depolarizing, short-acting, fast-acting neuromuscular blocker used to facilitate  
109 tracheal intubation and artificial ventilation.

110

### 111 **Scientific data from the literature**

112 Prevention of pain in newborns should be a priority for all caregivers, as pain transmission  
113 pathways are present in the fetus as early as 22 weeks of gestation<sup>2</sup>. The management of newborn  
114 pain by pharmacological or non-pharmacological means was the subject of a consensus by the  
115 American Academy of Pediatrics and the Canadian Pediatric Society in 2000 <sup>3</sup>. A large  
116 observational study conducted in the Paris region in 2005-2006 reports that the median number of  
117 painful procedures in neonatal intensive care units is 16 per child per day of hospitalization <sup>4</sup>.  
118 Beyond its ethically obvious nature, the management of newborn pain is important at many levels.  
119 Repeated exposure to pain during the neonatal period has adverse consequences on brain  
120 development<sup>5</sup>. In the long term, we observe in the former very premature infants an alteration of  
121 the sensitivity to the pain (which persists at least until the adolescence) <sup>6</sup> and behavioral  
122 modifications (anticipatory fear for pain with reactions of withdrawal) <sup>7</sup>. Premature newborns who  
123 have the highest risk of having neurological sequelae are also those who experience the most  
124 painful stimulation during their stay in neonatal resuscitation <sup>8</sup>. Finally, pain contributes to parental  
125 stress, which is all the more important because separation is early and prolonged <sup>9</sup>.

126 Endotracheal intubation is commonly performed in the NICU and delivery room. A  
127 declarative survey conducted in France in 46 NICUS and 38 delivery rooms showed that only 74%  
128 of newborns were intubated with sedation and / or analgesia <sup>10</sup>. A posteriori analysis of the  
129 EPIPAIN study showed that in 12 out of 13 pediatric and neonatal ICUs in Ile de France, specific  
130 premedication was only administered in 56% of neonatal intubations <sup>11</sup>. Yet this procedure is a  
131 painful and unpleasant experience <sup>12,13</sup> and there is a definite interest in intubating with  
132 premedication, as recently recommended by the American Academy of Pediatrics (AAP) <sup>14</sup>.  
133 Premedication reduces the time and number of attempts necessary for intubation <sup>15</sup>. Intubation

134 without analgesia increases intracranial pressure and thus potentially increases the risk of  
135 intraventricular hemorrhage<sup>16</sup>. In addition, laryngoscopy deforms the larynx and upper airways  
136 causing activation of the sympathetic and parasympathetic system responsible for bradycardia and  
137 increased intra-thoracic pressure<sup>17</sup>.

138 Reasons for not using analgesia may include lack of familiarity with premedication, fear of  
139 adverse effects, lack of sufficient evidence of efficacy, or lack of consensus on the optimal regimen  
140 of premedication. Several therapeutic classes have been evaluated for premedication before  
141 intubation and have been the subject of a recent comprehensive review<sup>18</sup>. Barbiturates do not  
142 diminish the occurrence of desaturations<sup>17,19</sup>. Midazolam seems dangerous if used alone<sup>20</sup>.  
143 Opioids used without a neuromuscular blocker are associated with frequent desaturations<sup>21,22</sup>. On  
144 the other hand, the combination of opioid and a neuromuscular blocker improves the conditions of  
145 intubation<sup>22</sup>. This opioid+neuromuscular blocker combination is therefore considered the gold  
146 standard of premedication before intubation<sup>23</sup>.

147 Propofol is a diisopropylphenol which has many theoretical advantages. Its activity is  
148 observed in less than a minute after intravenous administration. The duration of action is brief, the  
149 half-life in adults is 1.8 to 4.1 minutes<sup>24</sup>. The preparation of this drug is fast and easy because it is  
150 not necessary to dilute it, which decreases the risk of error. This drug can be used alone because it  
151 has no vagolytic action. It decreases the pharyngeal reflex and muscle tone facilitating intubation<sup>25</sup>  
152 and allows the maintenance of spontaneous breathing. Although it is not an analgesic, its  
153 effectiveness has been proven in many studies in children. It is commonly used as a premedication  
154 for bronchial<sup>26</sup> or digestive<sup>27</sup> fibroscopy in children. Propofol has also been shown to be effective  
155 for difficult intubations, for intubation in patients with vigil coma and for insertion of laryngeal and  
156 pharyngeal masks<sup>28,29</sup>.

157 The use of propofol is common in adults and children, in intensive care and anesthesia.  
158 Reported adverse reactions of propofol are mild injection pain and systemic hypotension. From a  
159 hemodynamic point of view, propofol decreases cardiac pre-load and post-load that can lead to  
160 systemic hypotension due to a decrease in sympathetic tone and vascular resistance<sup>30</sup> without any  
161 change in myocardial contractility<sup>31</sup>. In most cases, hypotension is brief without requiring volume  
162 expansion<sup>32</sup>. In the respiratory system, it has been shown that propofol can reduce the diameter of  
163 the airways; this effect is completely reversible with continuous positive airway ventilation<sup>33</sup>. In less  
164 than 2% of children undergoing endoscopy of the upper airway spontaneous ventilation under  
165 propofol, spontaneously resolving episodes of desaturation have been reported<sup>34</sup>. Only continuous  
166 intravenous infusion of propofol at a dose greater than 5mg / kg / h has been associated in adults  
167 and children with severe complications associating zinc deficiency, metabolic acidosis,  
168 rhabdomyolysis, hyperkalemia and renal failure that may lead to deaths<sup>35</sup>. Finally, maternal  
169 anesthesia with propofol for caesarean sections does not significantly alter the Apgar score in  
170 neonates compared to other analgesic protocols<sup>36,37</sup>.

171 Several animal studies have been conducted on the possible neurotoxicity of propofol.  
172 Indeed, propofol positively modulates the inhibitory function of GABA (gamma-amino-butyric  
173 acid) neurotransmitters causing a GABA accumulation by inhibition of reuptake and is an NMDA (N  
174 methyl D aspartate) receptor antagonist. In murine models, NMDA antagonists can induce massive  
175 neurodegeneration by apoptosis<sup>38</sup>. However, these events are dependent on the dose  
176 administered, the chosen injection schedule (single dose or continuous infusion), the duration of  
177 exposure, stage of development and other anesthetic agents administered simultaneously<sup>39</sup>. Al-  
178 Jadhari *et al.* in a dose-response study showed that exposure of neuronal growth cones from  
179 chicken embryos resulted in collapse of these embryos, which was reversible if the dose used was  
180 low and the exposure time was short<sup>39</sup>. The toxic doses used in this study are much higher than  
181 the doses used in humans. Vutskits *et al* identified an impairment of dendritic growth of rat neurons  
182 in vitro at doses considered clinically relevant<sup>40</sup>. In contrast, propofol has beneficial effects  
183 described by its antioxidant properties in the adult animal where a model of cerebral ischemia-  
184 reperfusion is observed to decrease neuronal apoptosis<sup>41</sup>. The mechanism of action involves a  
185 decrease in lipid peroxidation<sup>42</sup> and a decrease in the amount of free radicals<sup>43</sup>. In animals,  
186 propofol also has immunomodulatory effects. There is a decrease in mortality in anesthetized rats  
187 after induction of septic shock by bacterial endotoxin<sup>44</sup>. Propofol decreases the synthesis of pro-  
188 inflammatory cytokines (TNF $\alpha$  and IL-6) in vivo and in vitro<sup>45</sup>. It alters the immune functions of  
189 monocytes and polymorphonuclear neutrophils<sup>46</sup>. It has a protective effect on the lungs after  
190 experimental induction of ARDS with oleic acid<sup>47</sup>.

191 The interpretation of such experimental results is delicate and experts recommend the  
192 utmost caution in the transposition of animal data to humans<sup>48</sup>. All families of anesthetic drugs  
193 (opioids, benzodiazepines, GABA agonists, NMDA antagonists) have been implicated in the  
194 development of brain development disorders<sup>48,49</sup>. However, the fight against pain must remain a  
195 priority in Neonatology while ensuring a rigorous and long-term evaluation of new practices.

196  
197 Researchers in San Diego and Dartmouth have previously studied the value of adding a  
198 fast-acting neuromuscular blocker to an opioid before intubation in an open randomized study<sup>22</sup>.  
199 The atropine-fentanyl combination was compared to the atropine-fentanyl-mivacurium combination.  
200 The results of this study showed that the use of neuromuscular blocker combined with analgesia  
201 and anti-cholinergic decreased the time and number of attempts needed to intubate (confirmation  
202 of the secondary hypothesis) without significantly decreasing episodes of saturation lower than  
203 75% (reversal of the main hypothesis). In the mivacurium group (n = 21, mean weight: 1560g,  
204 mean age adjusted 31SA), 29% of children experienced a desaturation episode <75% with a  
205 duration greater than 30s. The total duration of the procedure was 31% shorter in the group  
206 receiving neuromuscular blocker and the total duration of laryngoscopy decreased by 41%.

207 Créteil's team carried out a prospective study for the evaluation of premedication with  
208 atropine, sufentanil and atracurium in newborns with less than 32 SA and / or less than 1500g (n =

209 35 intubations, median birth weight: 850g, mean gestational age at birth: 27.6 weeks, median age  
210 at intubation: 10 days, (IQR [4-16])<sup>50</sup>. The intubation conditions reported by the operator were  
211 "good or excellent" in 94% of cases and the success rate at the first attempt of 75%. However,  
212 desaturations below 80% lasting at least one minute were observed in one out of two cases.  
213 Episodes of desaturation are therefore a common adverse event in this population during the  
214 intubation procedure with the atropine-opioid-neuromuscular blocker combination. The time  
215 required to prepare drugs is another disadvantage of this triple therapy since Ghanta *et al.* reported  
216 a preparation time of 960 seconds (900 to 1200s)<sup>51</sup>. It is necessary to dilute the three products,  
217 each dilution exposing to a risk of error. Other notable adverse effects include the induction of  
218 thoracic rigidity or laryngospasm by fentanyl and its derivatives, making mechanical ventilation or  
219 intubation more difficult<sup>52</sup>. The neuromuscular blockers, in turn, induce prolonged muscle  
220 relaxation and apnea requiring rapid initiation of assisted ventilation. But they do not always  
221 prevent the occurrence of chest blocking phenomena induced by sufentanil<sup>50</sup>. These two  
222 phenomena can contribute to the occurrence of episodes of prolonged and/or severe desaturation.

223 In neonates, the only prospective randomized trial evaluating propofol as premedication  
224 before intubation was performed in an Australian center<sup>51</sup>. The hypothesis was that by allowing  
225 spontaneous breathing, the propofol-treated group would have fewer apneas and therefore  
226 potentially fewer episodes of hypoxemia during the procedure. The authors compared propofol at a  
227 dose of 2.5 mg / kg renewable as needed (n = 33) to a morphine-atropine-suxamethonium  
228 combination (n = 30) in neonates born at 25 to 31 weeks of gestation, with birth weights ranging  
229 from 759 to 1612g, intubation weight from 810 to 1972g, and age at intubation from 1 to 33 days.  
230 The results showed that sufficient muscle relaxation or sleep was achieved in 60 seconds in each  
231 group and that the intubation time was significantly shorter in the "propofol" group (120s versus  
232 260s). No difference in blood pressure and heart rate was observed between the groups. The  
233 median minimum oxygen saturation values during the procedure were significantly lower in the  
234 "morphine-atropine-suxamethonium" group (60 versus 80%). However, this minimum single  
235 saturation value does not necessarily indicate the duration or severity of hypoxia. The onset of  
236 anesthesia was faster in the "propofol" group (780 vs 1425s) and no serious adverse events were  
237 observed during the study, including no grade III or IV intraventricular hemorrhage.

238 Other descriptive studies have been published on the use of propofol as premedication  
239 before neonatal intubation. Papoff *et al.* reported the use of fentanyl (1.5 µg / kg in 1 minute) and  
240 propofol (2 mg / kg in 20 seconds) in 21 term or near term neonates<sup>53</sup>. The intubation conditions  
241 were good despite the occurrence of abrupt desaturations (> 60%) in 7 cases. In the majority of  
242 these cases, these desaturations were accompanied by a drop in blood pressure (undefined) that  
243 the authors treated with the administration of 10 ml / kg of normal saline bolus. In conclusion, the  
244 authors considered this association as safe and effective.

245 More recently, Welzing *et al.* published a pilot study of 13 newborns less than 8 hours of life  
246 eligible for the INSURE procedure (INTubation SURfactant Extubation)<sup>54</sup>. This pilot study was

247 prematurely interrupted due to the frequency of arterial hypotension defined by a mean arterial  
248 blood pressure <25 mm Hg. Propofol was administered as a bolus dose of 1 mg / kg in the first 6  
249 patients and over 60 seconds in the 7 following. In the first phase (bolus), 3 out of 6 patients  
250 experienced hypotension <25 mmHg 10 minutes after administration. In the second phase (1-  
251 minute injection), two patients experienced hypotension <25 mm Hg. In these 7 infants, mean  
252 pressure decreased from 37 mmHg to 28 mmHg 5 minutes after propofol administration. No  
253 significant changes in heart rate and O2 saturation were observed. No complications such as  
254 intraventricular hemorrhage, periventricular leukomalacia, necrotizing enterocolitis, retinopathy or  
255 bronchopulmonary dysplasia were observed in the 13 children who participated in the study. 85%  
256 of intubations were performed under conditions deemed "good" or "excellent".

257 In 2013, Simons *et al.* published their experience with propofol in 62 neonatal intubations<sup>55</sup>.  
258 The initial dose of 2 mg / kg was sufficient for 37% of patients. Hypotension occurred in 39% and  
259 was more common in the first day of life. However, the diversity of associated pathologies  
260 (necrotizing enterocolitis, sepsis) could potentially have increased the risk of hypotension.

261 Between March 2007 and December 2008, the NICU at the Centre Hospitalier  
262 Intercommunal de Creteil conducted an observational study of 33 intubations with propofol in  
263 infants born after 32 weeks of gestation<sup>56</sup>. The dose of 2.5 mg / kg was administered over 60  
264 seconds and could be repeated if necessary. Intubation conditions were rated as "good" or  
265 "excellent" in 91% of cases. Desaturation <80% for at least 1 minute occurred in 17 cases (52%)  
266 and bradycardia <100 / min for at least 1 minute in 5 cases (15%). Mean arterial blood pressure  
267 decreased at 5 and 10 minutes after injection (respectively -6.6 and -9.9 mmHg) but normalized  
268 spontaneously 15 minutes after injection. No significant changes in heart rate were observed. The  
269 identified risk factors for onset of desaturation were lower pre-intubation SpO2 (93% vs 98%) and  
270 longer duration of intubation (394 sec vs 167 sec).

271

## 272 **Predictable benefits and risks known to patients who are eligible for research**

273

274 The expected benefit for infants participating in this study is the systematic administration of a  
275 premedication before tracheal intubation except for life-threatening situations. These infants will  
276 also benefit from sustained surveillance during and after the procedure.

277 The expected risks are those commonly described during tracheal intubation in the newborn:  
278 bradycardia, desaturation, trauma to the upper airways. Premedication should avoid pain and  
279 discomfort, but expose children to the theoretical risk of chest stiffness and low blood pressure.

280 The interpretation of arterial hypotension in preterm infants is extremely difficult<sup>57</sup>. Indeed, it has  
281 been shown that the correlation between blood pressure and cardiac output is poor in these  
282 children<sup>58</sup>. Upper vena cava flow was more predictive of neurodevelopmental outcome at 3 years  
283 than arterial hypotension in premature infants<sup>59</sup>. However, routine measurement is difficult,  
284 especially during intubation.



285 Concerning neurodevelopmental outcome, no evidence in human clinical research  
286 (exclusively retrospective data) allows to fear a possible toxicity of non-surgical anesthetic  
287 treatment in neonates hospitalized in NICU<sup>48,60,61</sup>. However, short and long term neurological  
288 monitoring will be performed.  
289

## 290 **Description and justification of the route of administration, dosage, administration** 291 **schedule and duration of treatment** 292

293 The drugs studied are strictly reserved for the intravenous route. These treatments will be  
294 evaluated for a single episode of intubation corresponding to a single administration of the  
295 treatments.

### 296 Determination of doses

297 All children will receive atropine at a dose of 0.02 mg / kg IVD, ie 0.08 ml / kg of the 1 ml solution =  
298 0.25 mg. This dose is routinely used in pre-anesthesia to prevent vagal bradycardias associated  
299 with the use of neuromuscular blockers<sup>62</sup>. Atropine will be routinely administered to prevent vagal  
300 stimulation associated with laryngoscopy<sup>63</sup>.

301 Regarding propofol, the dose of 2.5 mg / kg was used for intubation of the preterm infant with no  
302 significant side effects, especially hemodynamic<sup>51</sup>. This study allowed a second injection of 2.5 mg  
303 / kg in case of failure of the first dose, which was necessary in 24% of cases<sup>64</sup>. In addition, a  
304 pharmacological study in the term and premature newborn showed that a single injection of 3 mg /  
305 kg resulted in rapid elimination of the product<sup>65</sup>. This same study established a slower elimination  
306 of the product in premature infants and children less than 10 days old. However, the occurrence of  
307 spontaneously resolving hypotension has been reported at a dose of 1 mg / kg in children younger  
308 than 8 hours<sup>54</sup>. Therefore, for the current study, a dose of 1 mg / kg is proposed, ie 0.1 ml / kg of  
309 propofol 1% in infants under 1000 g and 2.5 mg / kg, ie 0.25 ml / kg of propofol 1% in children over  
310 1000 g, slow IV over 1 minute. If a satisfactory sedation (see criteria in chapter "Methods") is not  
311 obtained an additional dose of 1 mg / kg (ie 3.5 mg / kg maximum cumulative dose), or 0.1 ml / kg,  
312 may be administered. Propofol 1% will be increased to a volume of 1 ml in children under 1000 g to  
313 allow injection over 60 seconds. It will be used pure for children over 1000 g.

314 If a patient is randomized to the atropine-sufentanil-atracurium group, he or she will receive  
315 atracurium after atropine to prevent the risk of sufentanil-related chest rigidity. A dose of 0.3 mg /  
316 kg of atracurium will be used. The dose of 0.5 mg / kg has been shown to be effective in neonates  
317<sup>66,67</sup>, as is the dose of 0.3 mg / kg in only 10 patients<sup>67</sup>. Efficient dose-finding studies have  
318 established an effective dose range of 0.3 to 0.7 mg / kg in neonates<sup>68,69</sup>. Finally, the occurrence  
319 of rare accidents in the United Kingdom has recommended a dose of 0.25 mg / kg in newborns<sup>70</sup>.  
320 We propose for this study a dose of 0.3 mg / kg corresponding to the local experience at Créteil's  
321 NICU<sup>50</sup>. The atracurium besilate will be diluted according to the following modality: 1ml = 10 mg in  
322 9 ml of D5% resulting in a solution diluted to 1 ml = 1mg. 0.3 ml / kg (ie 0.3 mg / kg) of the IV

323 diluted solution over 30 seconds will therefore be administered. In case of insufficient sedation, an  
324 additional dose of 0.1 ml / kg (ie 0.1 mg / kg) may be administered after the injection of sufentanil.  
325 Finally sufentanil will be injected. The loading dose of 0.2 µg / kg has been reported twice in the  
326 literature in neonates<sup>71,72</sup>, with both efficacy and good tolerance. In addition, it is regularly used in  
327 Créteil's NICU<sup>50</sup>. Very high doses (5 to 15 µg / kg) were administered in neonatal cardiac surgery  
328 with good tolerability and improvement in operative follow-up compared to the morphine-halothane  
329 group<sup>73</sup>. However, in view of the pharmacokinetic peculiarities of extremely low birth weight  
330 neonates, a dose of 0.1 µg / kg should be used in infants <1000 g and 0.2 µg / kg in infants > 1000  
331 g. Sufentanil will first be diluted according to the following scheme: dilute 1 ml = 5 µg in 4 ml of  
332 D5% resulting in a solution diluted to 1 ml = 1 µg. 0.1 or 0.2 ml / kg (0.1 or 0.2 µg / kg) of the  
333 diluted IV solution will be administered depending on the weight groups over 60 seconds to reduce  
334 the risk of thoracic rigidity. In the group of infants<1000 g, the volume of the syringe will be  
335 increased to 1 ml to allow injection over 60 seconds. In infants> 1000g, the drug will be used  
336 diluted according to the above-mentioned modalities.

337 With regard to the placebo for the studied drugs, the volumes of normal saline used in the  
338 propofol arm (0.5 ml maximum cumulative volume in children <1000 g and 0.6 ml / kg in children>  
339 1000 g) are considered negligible and without any effect on the blood volume or ionogram because  
340 they are lower than the flushing volumes currently used in daily practice. The volume of intralipids  
341 20% used in the sufentanil + atracurium arm represents a maximum of 0.2 ml / kg (<1000g) or 0.35  
342 ml / kg (> 1000 g) cumulative volume. These intakes correspond respectively to 0.04 g / kg (<1000  
343 g) and 0.07 g / kg of purified soybean oil. These minimal intakes do not affect global nutrient  
344 intakes of the order of 2 to 3 g / kg / 24h of lipids.

345

#### 346 **Declaration of compliance with the protocol, good clinical practices and the legal and** 347 **regulatory provisions in force**

348

349 The participating investigators undertake to respect the study protocol and to comply with the good  
350 practices in force. The legal and regulatory provisions in force will also be respected.

351 The choice of the atropine-opioid-neuromuscular blocker combination for the control group  
352 corresponds to the recommendations of the literature<sup>14,18,23</sup>. The choice of atropine-propofol is  
353 based on the pharmacological properties of propofol and the encouraging literature<sup>51,55,56</sup>.

354

#### 355 **Description of the population to be studied**

356

357 The study will include all premature or term neonates requiring tracheal intubation outside the  
358 context of the vital emergency and not presenting a contraindication to the use of the different  
359 experimental treatments (see criteria for non-inclusion). These children will be divided into two  
360 groups according to their weight at the time of intubation.

361  
362  
363

364

## 365 **Purpose and outcomes**

### 366 **Purpose**

367  
368 The aim is to compare two premedications: atropine-propofol and atropine-atracurium-sufentanil  
369 regarding desaturations during neonatal tracheal intubation on one hand, and regarding efficacy  
370 and tolerance on the other hand

371

### 372 **Hypothesis**

373  
374 "atropine + propofol" compared to "atropine+atracurium+sufentanil" will significantly reduce the  
375 frequency of severe hypoxemia.

376

### 377 **Primary outcome**

378  
379 Pulse oxymetry value < 80% for more than 60 seconds.  
380 Since desaturation is defined as O<sub>2</sub> saturation of less than 80% for at least 60 seconds, the main  
381 objective is to show that premedication with propofol decreases the frequency (percentage) of  
382 children with episodes of desaturation during tracheal intubation, the control group receiving  
383 atracurium-sufentanil. Both groups will receive atropine beforehand.

384

### 385 **Secondary outcomes**

386  
387 Number of attempts, duration of the procedure, quality of sedation, time to spontaneous respiratory  
388 and limb's movements' recovery, changes in physiologic parameters, short- and long-term  
389 neurodevelopmental outcomes.

390 The secondary objectives are to confirm the following assumptions:

391 Compared to the atracurium-sufentanil association as premedication before intubation,

392 - propofol will decrease the number of intubation attempts

393 - propofol will reduce the duration of intubation

394 - propofol will maintain the physiological parameters close to the basal state

395 - Propofol will not cause short- and long-term neurological adverse events (2 years)

## 396 **Methods**

### 397 **Trial design**

398

399 Study Type: Interventional, multicenter

400 Allocation: Randomized

401 Intervention Model: Parallel Assignment

402 Masking: Quadruple (Participant, Care Provider, Investigator, Outcomes Assessor)

403 Primary Purpose: Treatment

### 404 **Study proposal and consent from parents**

405

406 The protocol will be exposed to the parents of all infants admitted to the to the neonatal intensive  
407 care unit. Parents will be informed about the objectives, methods, expected benefits and potential  
408 risks of the study and any inconvenience this may cause to their child. In cases where only one  
409 parent is present (absent father or mother hospitalized in another maternity and not immediately  
410 transportable), the written informed consent can be obtained from the present parent and the oral  
411 consent by telephone from the absent parent, who will sign the consent form as soon as he / she  
412 can move. This procedure should remain exceptional if no other solution to meet the parents  
413 directly is possible. Parents can also be approached if an upcoming intubation is planned and they  
414 are both present. Parents should be informed that they are free to revoke their consent at any time.  
415 The investigator will attest by affixing his / her signature at the bottom of the "Consent Form" that  
416 he / she has delivered all of the information contained in the information form.

417 The parent (s) will certify by their signature on the same form that they have received this  
418 information and that they voluntarily participate in the project without any pressure being exerted  
419 on them.

420 Once signed, the original will be archived by the investigator, a copy will be transmitted by the CRA  
421 monitor to Activ in sealed envelope in order to respect the anonymity of the subject and a copy will  
422 be given to the parents. In case of intubation in an eligible infant with signed parental consent, the  
423 child will be included in the study and the parents will be notified according to the usual local  
424 practices (telephone call or interview, immediately or after a delay).

### 425 **Data collection**

426

427 A team member who will not be directly involved in the intubation procedure will be designated as  
428 an "observer". He/she will be responsible for the collection of data.

429 The child's birth date, age and corrected age, birth weight and current weight, sex, 5 minutes  
430 Apgar score, reason for intubation, personal history of intubation and last cranial ultrasound will be  
431 recorded before the start of the procedure. If the child had nocranial ultrasound performed within  
432 the previous 7 days, one should be performed before inclusion.

433 The collection of the physiological parameters will begin 1 minute before the first injection and will  
434 be continued one hour after. Heart rate, pulse oximetry and blood pressure will be obtained one  
435 minute prior to injection of the first drug (atropine) and will be used as the baseline. Throughout the  
436 procedure, heart rate, transcutaneous CO<sub>2</sub> partial pressure (TcPCO<sub>2</sub>) and oxygen saturation will  
437 be monitored continuously and blood pressure will be measured every three minutes by the  
438 monitoring system used in each service. O<sub>2</sub> saturation will be measured by oximeters using  
439 Masimo technology <sup>74</sup> in all participating centers. Heart rate, blood pressure, O<sub>2</sub> saturation,  
440 TcPCO<sub>2</sub>, cerebral activity via cerebral oximetry and ventilatory constants will be recorded 1 minute  
441 before the first injection, then 3, 6, 9, 12, 15, 30, 45 and 60 minutes after the start of the first  
442 injection.

443 The observer will collect vital parameters before the procedure and then, during the procedure, the  
444 lowest heart rate, lowest saturation and the lowest and highest arterial pressures. He/she will  
445 measure the duration of intubation, the recovery time of spontaneous ventilation and the recovery  
446 time of spontaneous movements after the first drug injection. By controlling on the central monitor  
447 recordings, he/she will confirm the occurrence of the primary outcome (desaturation of less than  
448 80% for at least 60 seconds). This recording of physiological data will be stored and printed or  
449 saved in a digital format as source data. If no record can be made, the handwritten record sheet  
450 completed by the observer will serve as source data.

451 The time will be measured from the insertion at the last ablation of the laryngoscope from the  
452 mouth after the success of the intubation. Intubation will be considered successful by clinical  
453 confirmation of bilateral lung sounds on auscultation, increased heart rate and saturation, and by  
454 the presence of an inspiratory and expiratory curve obtained through the respirator's spirometry  
455 sensor. In both groups, the duration of action of the drugs administered will be noted.

456 A standardized collection sheet will indicate the level of training of the operator, the number of  
457 attempts for each operator, the total number of attempts required and the existence of any  
458 complications such as thoracic stiffness, lacerations of the mouth or lips.

459 For neurological surveillance, aHUS will be performed within 7 days of intubation and will be  
460 compared to the pre-intubation examination if it exists. The follow-up of the children will be  
461 performed in each unit during outpatient visits at the corrected ages of one and two years. A  
462 questionnaire corresponding to the French version of the questionnaire Age and Stages  
463 Questionnaire (ASQ) <sup>75</sup> will then be completed. In the absence of outpatient visits, parents will be  
464 called by telephone at the same dates and asked to complete the same questionnaire.

## 465 **Intervention**

466  
467 After randomization and when the drugs are ready for use, the patient will be equipped with a pulse  
468 oxymetry sensor on his right hand. He/she will be positioned in the incubator and pre-oxygenated  
469 thanks to an artificial ventilation system connected to a face mask and delivering a positive  
470 expiratory pressure (PEP): respirator or bag equipped with a PEEP valve, with an FiO<sub>2</sub> allowing to

471 obtain an SpO<sub>2</sub> ≥ 95%. The intubation will be performed by a junior or senior doctor with a  
 472 laryngoscope and an appropriately sized endotracheal tube (ETT) through the orotracheal or  
 473 nasotracheal route according to usual local practices. The common practice in the departments  
 474 participating in the study is to use the nasotracheal route as first-line and to favor junior doctors as  
 475 the first operator if the condition of the child allows it and under the supervision of a Senior doctor.  
 476 In case of failure, the second operator is usually a senior. There will be no rule imposed on the  
 477 sequence of the operators because this trial aims to compare the premedications under the usual  
 478 conditions of practice of the neonatal intubations. However, the level of experience of the operator  
 479 (s) will be collected in order to allow a possible adjustment to this criterion if the distribution  
 480 between the groups is different.

| <b>weight ≤1000 g</b>                                    |                                                                                                                                                                                                   |                                                                                                                                                                                          |
|----------------------------------------------------------|---------------------------------------------------------------------------------------------------------------------------------------------------------------------------------------------------|------------------------------------------------------------------------------------------------------------------------------------------------------------------------------------------|
| <b>Syringe</b>                                           | <b>SufTrac group</b>                                                                                                                                                                              | <b>Prop Group</b>                                                                                                                                                                        |
| N°1                                                      | Atropine (1ml= 250 µg) 20 µg/kg<br>0.08 ml/kg IV bolus                                                                                                                                            | Atropine (1ml= 250 µg): 20 µg/kg<br>0,08 ml/kg IV bolus                                                                                                                                  |
| N°2<br><i>Prepare syringe<br/>n°5<br/>simultaneously</i> | Atracurium 1 ml= 10 mg + 9 ml 5%D:<br>0.3 mg/kg<br>-> 1 ml= 1 mg : 0.3 ml/kg of the<br>dilution IV 30 sec                                                                                         | Normal saline 1 ml + 9 ml 5%D<br><br>0.3 ml/kg of the dilution IV 30 sec                                                                                                                 |
| N°3                                                      | Sufentanil 1 ml =5µg + 4 ml 5%D: 0.1<br>µg/kg<br>-> 1ml =1µg : 0,1 ml/kg of the dilution<br>The volume of the syringe will be<br>increased to 1 ml with 5%D to allow<br>injection over 60 seconds | Normal saline 1 ml + 4 ml 5%D<br>0.1 ml/kg de la dilution<br><br>The volume of the syringe will be<br>increased to 1 ml with 5%D to allow<br>injection over 60 seconds                   |
| N°4<br><i>Prepare syringe<br/>n°6<br/>simultaneously</i> | Intralipids 20%: 0.1 ml/kg<br><br>Increase the volume of the syringe<br>with 5%D for injection over 60<br>seconds, without exceeding 5 times<br>the initial volume of the syringe                 | Propofol 1%: 1 mg/kg<br>0.1 ml/kg<br><br>Increase the volume of the syringe with<br>5%D for injection over 60 seconds,<br>without exceeding 5 times the initial<br>volume of the syringe |
| N° 5                                                     | <u>If re-injection required :</u><br>Same dilution as syringe N°2 : 0.1<br>ml/kg                                                                                                                  | <u>If re-injection required :</u><br>Same dilution as syringe N°2 : 0.1<br>ml/kg                                                                                                         |

|      |                                                                               |                                                                               |
|------|-------------------------------------------------------------------------------|-------------------------------------------------------------------------------|
| N° 6 | <u>If re-injection required :</u><br>Same dilution as syringe N°4 : 0.1 ml/kg | <u>If re-injection required :</u><br>Same dilution as syringe N°4 : 0.1 ml/kg |
|------|-------------------------------------------------------------------------------|-------------------------------------------------------------------------------|

481 The children will be randomized and 6 syringes will be prepared for each child: 4 syringes  
 482 corresponding to the initial injections, 2 syringes for re-injections.  
 483 The contents of the syringes are illustrated in the following tables according to weight at  
 484 randomization:  
 485



| weight >1000 g                                           |                                                                                                                                                                                                  |                                                                                                                                                                                             |
|----------------------------------------------------------|--------------------------------------------------------------------------------------------------------------------------------------------------------------------------------------------------|---------------------------------------------------------------------------------------------------------------------------------------------------------------------------------------------|
| Syringe                                                  | SufTrac group                                                                                                                                                                                    | Prop Group                                                                                                                                                                                  |
| N°1                                                      | Atropine (1ml= 250 µg) 20 µg/kg<br>0.08 ml/kg IV bolus                                                                                                                                           | Atropine (1ml= 250 µg): 20 µg/kg<br>0,08 ml/kg IV bolus                                                                                                                                     |
| N°2<br><i>Prepare syringe<br/>n°5<br/>simultaneously</i> | Atracurium 1 ml= 10 mg + 9 ml 5%D:<br>0.3 mg/kg<br>-> 1 ml= 1 mg : 0.3 ml/kg of the<br>dilution IV 30 sec                                                                                        | Normal saline 1 ml + 9 ml 5%D<br><br>0.3 ml/kg of the dilution IV 30 sec                                                                                                                    |
| N°3                                                      | Sufentanil 1 ml =5µg + 4 ml 5%D<br>0.2 µg/kg<br>-> 1ml =1µg : 0.2 ml/kg of the dilution<br>The volume of the syringe will be<br>increased to 1 ml with 5%D to allow<br>injection over 60 seconds | Normal saline 1 ml + 4 ml 5%D<br>0.2 ml/kg of the dilution<br><br>The volume of the syringe will be<br>increased to 1 ml with 5%D to allow<br>injection over 60 seconds                     |
| N°4<br><i>Prepare syringe<br/>n°6<br/>simultaneously</i> | Intralipids 20%: 0.25 ml/kg<br><br>Increase the volume of the syringe<br>with 5%D for injection over 60<br>seconds, without exceeding 5 times<br>the initial volume of the syringe               | Propofol 1%: 2.5 mg/kg<br>0.25 ml/kg<br><br>Increase the volume of the syringe with<br>5%D for injection over 60 seconds,<br>without exceeding 5 times the initial<br>volume of the syringe |
| N° 5                                                     | <u>If re-injection required :</u><br>Same dilution as syringe N°2 : 0.1<br>ml/kg                                                                                                                 | <u>If re-injection required :</u><br>Same dilution as syringe N°2 : 0.1<br>ml/kg                                                                                                            |
| N° 6                                                     | <u>If re-injection required :</u><br>Same dilution as syringe N°4 : 0.1<br>ml/kg                                                                                                                 | <u>If re-injection required :</u><br>Same dilution as syringe N°4 : 0.1<br>ml/kg                                                                                                            |

486

487

488

489

490 The first 4 syringes will be injected to all children. If acceptable sedation is not achieved, syringes 5  
491 and 6 will be injected.

492 Sedation will be satisfactory if the following 3 criteria are satisfied:

- 493 - Absence of facial expression,  
494 - Absence of spontaneous movement,  
495 - Absence of reaction to stimulation

496 In each group, if the oxygen saturation falls below 60%, the procedure will be stopped and  
497 ventilation will be resumed with the mask, attempting to increase the saturation to more than 90%  
498 within a maximum of three minutes. Beyond these three minutes, or earlier according to the

499 operator's judgment, a new intubation will be attempted. A "senior" will attend each intubation.

500

## 501 **Outcomes**

502

### 503 Primary Outcome Measure

504 • Desaturation: Pulse oxymetry value measured by Masimo technology below 80% for 60 seconds  
505 or more. Intubation procedure is defined by the time between first laryngoscope insertion and last  
506 laryngoscope removal after successful intubation. Successful intubation is defined by clear bilateral  
507 breath sounds, increasing heart rate and saturation (if previously low) and appropriate flow curves  
508 on the ventilator.

509

### 510 Secondary outcomes

511 • Number of intubation attempts: each insertion of the laryngoscope in the mouth is considered an  
512 attempt.

513 • Duration of intubation procedure: Duration of intubation is defined by the time between first  
514 laryngoscope insertion and last laryngoscope removal after successful intubation. Successful  
515 intubation is defined by clear bilateral breath sounds, increasing heart rate and saturation (if  
516 previously low) and appropriate flow curves on the ventilator.

517 • Heart rate: Heart rate recordings 1 minute before the first injection and at 3, 6, 9, 12, 15, 30, 45  
518 and 60 minutes after the first injection

519 • Pulse oxymetry: Pulse oxymetry recordings 1 minute before the first injection and at 3, 6, 9, 12,  
520 15, 30, 45 and 60 minutes after the first injection

521 • Mean blood pressure: Blood pressure recordings 1 minute before the first injection and at 3, 6, 9,  
522 12, 15, 30, 45 and 60 minutes after the first injection

523 • Transcutaneous PCO<sub>2</sub> (TcPCO<sub>2</sub>) measurement: TcPCO<sub>2</sub> recordings 1 minute before the first  
524 injection and at 3, 6, 9, 12, 15, 30, 45 and 60 minutes after the first injection

525 • Time to spontaneous respiratory movements' recovery: Time between the first syringe injection  
526 and the first onset of the trigger logo of the ventilator used for conventional ventilation if a  
527 synchronized mode is used or first inspiratory effort through direct observation if high frequency  
528 oscillation or ventilation is used.

529 • Time to spontaneous limbs movements' recovery: Time between the first syringe injection and  
530 the first spontaneous limb movements' through direct observation of the neonate.

531 • Quality of sedation: Assessed immediately after completion of the procedure by the operator  
532 who succeeded the intubation according to the following scale adapted from Hans <sup>76</sup> and Cooper  
533 <sup>77</sup>:

534 Excellent: Relaxed jaw and open vocal cords and no movement when inserting ETT

535 Good: Relaxed jaw and open vocal cords and mild movements when inserting ETT

536 Acceptable: Mild jaw contraction and/or moving vocal cords and/or cough when inserting ETT

537 Poor: Jaw contraction or closed vocal cords or intense cough or rigidity when inserting ETT.

538 • Short term neurological outcome: Head ultrasound

539 • Long term neurodevelopmental outcome: Age and stages questionnaire (ASQ)

540

## 541 **Measures to reduce bias**

542

### 543 **Randomization**

544

545 Randomization will be centralized on line using a password. The randomization software will  
546 indicate the kit number to be used according to a pre-established randomization table stratified by  
547 center and by weight category. This assignment code will allow anonymization of the data. The  
548 programming of this randomization will be checked and validated by a second operator before  
549 putting it online.

550 To prevent a center from making almost all inclusions, which would impair the representativeness  
551 of the results, the number of patients per center will be limited to 100.

552 The number of inclusions may thus vary from one center to another, the important thing being that  
553 the two treatment groups remain balanced.

554

### 555 **Masking**

556

557 The placebo for propofol will be manufactured by Baccinex (Courroux, Switzerland) and will be  
558 sent to Theradis Pharma (Cagne-sur-mer, France). Kits containing 1 ampoule of atropine, 2  
559 ampoules filled with a transparent fluid and 1 bottle of 50 ml filled with a white emulsion will be  
560 packaged and manufactured by the company Theradis Pharma (Cagne-sur-mer, France)  
561 according to the regulatory rules. The ampoules and vials will have a strictly identical exterior  
562 appearance between the verum and the placebo.

563

### 564 **Dosage and ways of administration of treatments. Unit shape, packaging and labeling**

565

566 The atropine used will be atropine sulfate RENAUDIN 0.25mg / ml for injection. Each 1 ml ampoule  
567 contains 0.25 mg of atropine.

568 Propofol Frésenius 1% is an injectable (oil-in-water, white and isotonic) emulsion in 50 ml vials.

569 Each 50 ml vial contains 500 mg propofol, i.e. 1 ml contains 10 mg propofol. Excipients: soybean  
570 oil, egg lecithin, glycerol, oleic acid, sodium hydroxide, water ppi.

571 The atracurium used will be the Tracrium® GLAXOSMITHKLINE solution for injection 10mg / ml

572 containing atracurium besilate in vials of 5ml = 50mg. Excipients: 32% benzenesulfonic acid

573 solution qs pH 3 to 3.8, water.

574 Sufentanil JANSSEN (Sufenta<sup>l</sup>) 5µg / ml injectable solution is to be used. Each 10 ml vial contains  
575 50 micrograms of sufentanil. Excipients: sodium chloride, sodium hydroxide qs pH4,5-7,0,  
576 hydrochloric acid qs pH4,5-7,0, water.

577 Placebo for propofol will be a 20% Intralipid lipid emulsion packaged in 250 ml glass bottles  
578 (Frésenius Kasbi) used for parenteral nutrition in newborns. This product will be deconditioned in  
579 sterile conditions by Baccinex and reconditioned in sterile conditions in 50 ml vials. Baccinex will  
580 perform autoclaving and stability feasibility tests prior to the start of the study.

581 The normal saline solution Lavoisier solution for injection will be packed in vials of 10 and 5 ml  
582 constituting respectively the placebo for sufentanil and atracurium. The "heads" of sufentanil and  
583 atracurium vials have specific colour lines that do not appear on the "heads" of saline vials,  
584 Theradis Pharma will thus mask the heads of the 10 and 5 ml vials.

### 585 **Duration of participation and follow-up**

586  
587 For the primary outcome, a patient will participate from his/her randomization to one hour after the  
588 first drug injection. For long-term follow-up, data collection is planned up to two-years corrected  
589 age.

### 590 **Definitive or Temporary Termination Rules**

591  
592 For an included patient

593 Since the trial involves a single prior administration of the medicinal product, participation may only  
594 be halted if there is a serious adverse reaction during the course of treatment or in case of  
595 sedation deemed insufficient by the operator: the operator will then administer the treatments  
596 deemed appropriate to the child's condition. However, data for this child will be analyzed (intention-  
597 to-treat analysis).

598 For the research

599 The research will be interrupted on the advice of the safety committee, which will examine serious  
600 adverse events that may or may not be attributable to the experimental treatments and suspend  
601 the study according to predefined criteria (see appropriate paragraph).

### 602 **Treatment kits monitoring**

603  
604 Theradis Pharma will deliver treatment kits to local pharmacies of the participating centers.  
605 The distributed and administered treatments will be recorded on a list established by the center  
606 and containing the batch number of each kit as well as its expiry date. CTs and pharmacists will be  
607 responsible for updating this list and, in each center, the adequacy of treatments to inclusions.

### 608 **Blinding maintenance and unblinding procedure**

609  
610 Unblinding will be performed at the request of the investigators or at the request of the supervisory  
611 committee.

612 An investigator will have the possibility to unblind the allocated treatment for a patient only if he/she  
613 considers that the knowledge of the treatments administered is indispensable to the care of the  
614 patient. In this case, he/she will obtain from the local pharmacy the sealed envelope corresponding  
615 to the patient. He/she will have to warn within 48 hours the investigating coordinator of the  
616 unblinding procedure.

617 The Safety Committee will have the possibility to waive blinding for one or several patients if a pre-  
618 defined number of serious adverse events occur, possibly or certainly attributable to the  
619 administration of drugs (see appropriate paragraph).

620 In all other cases, blinding will be maintained.

## 621 **Source data**

622  
623 The source data for each patient will be recorded on an anonymized clinical research form (CRF),  
624 in each center, by the designated investigators, and collected by and centralized at ACTIV. The  
625 CRF will be verified and validated by the designated investigators at each center and the CRA.  
626 These CRFs will be kept under lock at the CHIC and duplicates will be kept in each participating  
627 center. In case of missing data or for the purpose of verification, access to the medical chart of  
628 each included patient will be granted to the CRA while respecting medical confidentiality.

629

## 630 **Participants**

631

### 632 **Inclusion Criteria**

633  
634 Any newborn (corrected term <45 weeks of gestation) hospitalized in the neonatal intensive care  
635 unit and requiring non-urgent or semi-urgent intubation, equipped with a reliable and usable intra  
636 venous access, with parental consent, who was never included in the study previously.

### 637 **Non-Inclusion Criteria**

- 638  
639 - Lack of parental consent (failure to provide correct information to parents)  
640 - Parental refusal  
641 - Administration of sedative or anesthetic treatment in the previous 24 hours  
642 - Hemodynamic failure defined by a mean arterial pressure <corrected GA and / or capillary refill  
643 time> 3 seconds  
644 - Evidence of ENT malformation or obvious condition suggesting especially difficult intubation  
645 - Life-threatening situation requiring intubation without premedication  
646 - Participation in another exclusive clinical trial  
647 - Impossibility of placing intra venous access  
648 - Known intolerance to sufentanil or to opioids

- 649 - Association with morphine antagonists: nalbuphine, buprenorphine, pentazocine
- 650 - Risk of glaucoma
- 651 - Paralytic Ileus
- 652 - Urethro-prostatic disorders with risk of urinary retention
- 653 - Known hypersensitivity to propofol, soybean, peanuts, or any of the excipients of the emulsion
- 654 - Allergy to soya or peanuts
- 655 - Hypersensitivity to atracurium, cisatracurium or benzene sulfonic acid
- 656 - Acute shock
- 657 - Severe dyslipidemia
- 658 - Severe hepatic failure
- 659 - Severe coagulation disorders,
- 660 - Known or suspected hypersensitivity to egg phospholipids, soybean or peanut proteins or to any
- 661 of the active substances or to any of the excipients contained in the intralipids.
- 662

663 **Procedures for premature termination of treatment administration and for patient's**  
664 **exclusion**  
665

666 **Criteria and procedures for discontinuing treatment and excluding a person from research**

667  
668 Premature discontinuation of treatment can only occur in the case of a serious adverse effect  
669 during treatment (exceptional situation). The criteria for the immediate cessation of intravenous  
670 injection during treatment are:

- 671 - Sudden appearance of a lesion at the injection site
- 672 - Central circulatory disorders with tachycardia > 200 / min or bradycardia < 60 / min. In the event of
- 673 a state of shock, volume expansion and inotropes must be readily available for each intubation.
- 674 A patient will be excluded from the search if the parents withdraw consent.
- 675

676 **Method and timing of data collection**

677  
678 Premature cessation of treatment or a patient's exclusion should be transmitted within two working  
679 days to the coordinating investigator. A summary of these data will be made every 3 months.

680 **Modality for the replacement of excluded patients**

681  
682 No alternative arrangements are planned, these circumstances being considered as exceptional.

683 **Follow-up**

684  
685 In the short term, monitoring will be continuous (see methodology).

686 In the medium term, a head ultrasound should be performed within 7 days after the patient's  
687 inclusion. All serious adverse events occurring within one week after inclusion of a patient should  
688 also be collected and reported (see appropriate paragraph).  
689 In the long term, neurodevelopmental follow-up will be carried out during outpatient visits or by  
690 phone. Clinical evaluation will be performed during outpatient visits within each participating center.  
691 The telephone assessment will be carried out at the corrected ages of one and two years  
692 according to the French version of the Age and Stage Questionnaire (ASQ)<sup>75</sup>.

## 693 **Treatments given to participants**

### 694 695 **Description of the treatments needed to carry out the research**

696 The treatments used (atropine, propofol and atracurium-sufentanil combination)  
697 have been previously described in this Protocol.  
698

### 699 **Medicinal products and treatments authorized and prohibited under the Protocol**

700 Administration of a sedative or anesthetic treatment within 24 hours prior to intubation constitutes a  
701 non-inclusion criteria in the study.  
702

703 The administration of a morphine agonist-antagonist treatment is contraindicated within 24 hours of  
704 inclusion.

705 Any treatment deemed necessary for the patient is permitted. In the absence of extreme agitation  
706 or obvious pain, no sedative or anesthetic treatment should be administered within 1 hour of the  
707 study treatment.

### 708 **Method for treatment follow-up and compliance**

709 The treatment kit assignment will be done after randomization under the prescription of the doctor  
710 carrying out the study in each unit.

711 The kit number assigned to each patient will be printed and included in the CRF.

712 The volumes of each injected solution will be recorded during the study by direct observation.

713 Given the uniqueness of the administration, no compliance problems are to be feared.

714 The remaining quantities of unused product will be disposed of and empty vials will be sent to the  
715 local pharmacies at each center for posting and tracking of batches.  
716

### 717 **Storage conditions of experimental drugs**

718 Propofol can be stored at a temperature not exceeding 25 ° C. It can also be stored at + 4 ° C, at  
719 which temperature its stability is 36 months. It must be used within 6 hours of its preparation. The  
720 unused quantity should be discarded.  
721

722 Atropine can be stored at room temperature or between + 4 ° C and + 8 ° C (lab advice Aguetant).

723 Sufentanil may be stored at room temperature at a temperature not exceeding 25 ° C. It should be  
724 used within 24 hours of its preparation. The unused quantity should be discarded.  
725 Atracurium should be stored in the refrigerator (between + 2 ° C and + 8 ° C) and should not be  
726 frozen. The ampoules should be stored in the box in order to protect them from light. Once  
727 prepared, atracurium should be used immediately. The unused quantity should be discarded.  
728 Lavoisier sodium chloride 0.9 per cent solution for injection, packaged in glass vials requires no  
729 special storage precautions.  
730 Intralipids 20% Fresenius must be stored at a temperature below 25 ° C.  
731 The study kits will therefore be stored between + 2 ° C and + 8 ° C in a locked refrigerator provided  
732 to the centers by the sponsor for study purposes. The key of this refrigerator will be kept and made  
733 available in each pharmacy for internal use according to the same modalities as the key allowing  
734 the access to narcotics.  
735 Within Theradis Pharma, under the procedure "Management of narcotic drugs and psychotropic  
736 drugs":  
737 The narcotics are stored in a locked area, access to which is protected by a grid. This room  
738 contains nothing but narcotics. It is also equipped with a refrigerator and a freezer for special  
739 storage conditions.  
740 Only the Responsible Pharmacist and the Quality Assurance Manager of the Pharmaceutical  
741 Affairs know where the key is located.

## 742 **Efficacy assessment**

743

### 744 **Description of Efficacy Assessment Parameters**

745

746 The efficacy of premedication will be evaluated according to the previously stated criteria for  
747 sedation to be achieved within two minutes of administration:

- 748 - Absence of facial expression,
- 749 - Absence of spontaneous movement
- 750 - Absence of reaction to stimulation

751 The efficacy of propofol compared to the atracurium-sufentanil combination will be evaluated by a  
752 significant decrease in the frequency (percentage) of children with desaturation <80% for at least  
753 60 seconds.

### 754 **Method and timeline for measuring, collecting and analyzing efficacy endpoints**

755

756 Episodes of desaturation <80% for at least 60 seconds will be identified by continuous monitoring  
757 analysis. The data collected for each patient, including the number of desaturations, will be  
758 collected every three months in each center by a CRA. The frequency of visits may be adapted to  
759 the inclusion rate of each center.



760 At the end of the study, the analysis will cover all studied infants.

761

## 762 **Safety assessment**

763

### 764 **Safety assessment Parameters**

765

766 An adverse event (AE) is defined as any adverse event in a patient in a clinical trial that is not  
767 necessarily linked to the treatment provided in the clinical trial. All adverse events encountered  
768 during the study will be recorded in the CRF in the dedicated section. This study falls within the  
769 scope of the law of 20 December 1988, as amended, protection of persons who lend themselves to  
770 biomedical research, the measures necessary to ensure that the provisions of Article L. 209-12 6th  
771 paragraph of the Public Health Code are respected, will be implemented. In particular, all serious  
772 adverse events likely to be related to the research will be reported. The investigators of each  
773 center will be responsible for establishing the accountability of the experimental treatment for the  
774 occurrence of the adverse event according to 3 modalities:

775 - not attributable;

776 - possibly attributable;

777 - certainly attributable.

778 A serious adverse event will be a serious adverse event that is either possibly or certainly  
779 attributable to one or more of the experimental drugs.

780 The investigator is responsible for informing the sponsor of any serious adverse event.

781 Responsibility for reporting such events to the supervisory authorities rests with the proponent.

782 Serious adverse events (SAEs) are considered to occur when an AE:

783 - Causes death,

784 - Involves the vital prognosis,

785 - Causes a temporary or permanent disability or incapacity,

786 - Requires or extends the hospitalization of a patient.

787

788 Some of the serious adverse events are listed in the following list, which is however not  
789 exhaustive:

790 - Deaths

791 - Heart failure

792 - Pneumothorax

793 - Sepsis

794 - Necrotizing enterocolitis

795 - Grade III or IV intraventricular haemorrhage

796 - Neurological lesion (peri-ventricular leucomalacia, ischemia, haemorrhage)

797 - Severe metabolic acidosis (pH <7.00, excess of base <15 mmol / l)

798

### 799 **Methods and schedule for AE declaration**

800

801 AEs will be collected within one hour of the start of treatment.

802 Investigators will be required to report the occurrence of any SAE that appears within seven days

803 of inclusion. The declaration of these SAEs must be made without delay to ACTIV as soon as the

804 investigator of the center becomes aware of it. The SAEs will be analyzed in real time.

### 805 **Procedures for registration and notification of adverse reactions**

806

807 The AEs will be recorded in the CRF after the CRA has verified the data.

808 - Serious adverse events (adverse events possibly or certainly attributable to experimental

809 treatments) will be counted as they are notified and may lead to discontinuation of the study. The

810 pharmacovigilance unit of For Drug Consulting is responsible for analysis and declarations to the

811 competent authorities. The safety committee will be composed of Dr Sophie Saizy-Callaert,

812 pharmacist at CHIC, Prof. Gilles Dhonneur, Anaesthesiologist- Intensivist at the CHU Henri

813 Mondor and a Neonatologist, Dr. Elisabeth Walter, neonatology department, Hôpital Saint Joseph,

814 Paris. The rules for stopping the study will be as follows:

815 - Occurrence of two deaths directly attributable to the administration of drugs (frequency 1%);

816 - Occurrence of three cardiac arrests requiring external cardiac massage and / or adrenaline  
817 administration directly attributable to drug administration (frequency 1.5%)

818 - Occurrence of twelve new episodes of intraventricular haemorrhage grade III or IV and / or  
819 leucomalacia within 7 days of administration in the population of children under 1000 g  
820 (frequency 15%).

821 These SAEs leading to study interruption will be communicated by the study coordinator via e-mail  
822 to the investigators of each center who will be responsible for their transmission to the rest of the  
823 team.

824 The protocol, patient information note and consent may be amended if new safety information is  
825 updated.

826

### 827 **Follow-up of persons following the occurrence of adverse events**

828

829 Follow-up will be the one planned for the study. In case of a SAE, follow-up adapted to the

830 patient's state of health and corresponding to the usual practices of the service will be offered.

831

832

833

## 834 **Statistics**

835

### 836 **Statistical methods and timing of intermediate analysis**

837

#### 838 *Initial analysis plan (as of September 2011) not executed*

839

840 *Pretreatment characteristics between groups (sex, gestational age, chronological age and*  
841 *corrected age, birth weight and present weight, 5-minute Apgar score, oxygen saturation, blood*  
842 *pressure, cardiac and respiratory rate, history of intubation, intubation) will be compared using*

843 *Mantel and Haenzel tests (sex, gestational age, 5-minute Apgar score) or 2-factors variance*

844 *analysis (all other variables). The randomization is stratified on the weight of the child at the time of*  
845 *intubation and on center, the two groups will be not be compared for these characteristics because*  
846 *of the randomization process.*

847 *Analysis of primary and secondary outcomes (frequency of the children with desaturation, SpO<sub>2</sub>,*  
848 *blood pressure and heart rate, number of attempts and total duration of intubation) will also involve*  
849 *the Mantel and Haenszel test (frequency of the children with desaturation, indication for intubation*  
850 *and number of intubation attempts) and analysis of variance (for total duration of intubation).*

851 *A subgroup analysis according to weight categories will be performed if the interaction test (chi<sup>2</sup>*  
852 *homogeneity) shows a difference in the effect of premedication on the primary outcome according*  
853 *to weight categories.*

854 *No interim analysis is planned, the continuation of the study being based on the previously defined*  
855 *stopping rules.*

856

#### 857 *Final analysis plan (as of November 2016, established before data was released) executed*

858

859 *Pretreatment characteristics (sex, gestational age, chronological age and corrected age, birth*  
860 *weight and present weight, 5-minute Apgar score, oxygen saturation, blood pressure, cardiac and*  
861 *respiratory rate, history of intubation, intubation) will be described by groups and no statistical test*  
862 *will be performed to compare the two groups at baseline.*

863 *For the frequency of children with desaturation (primary outcome) and worsening of head*  
864 *ultrasound, the analysis will be conducted according to the intent to treat principle using a*  
865 *generalized mixed model with a log-binomial distribution adjusted on weight at inclusion ( $\leq 1000g$ ,*  
866  *$>1000g$ ) accounting for randomization structure and treating center as a random effect*  
867 *(exchangeable within-center correlation structure). Generalized linear mixed models are an*  
868 *extension of linear mixed models to allow response variables from different distributions, such as*  
869 *binary responses, which is the case for our primary outcome. In that type of model, we have to*

870 specify the distribution of the variable to explain (ie, the outcome). For the primary outcome, which  
871 is a binary outcome, we used a log-binomial distribution to obtain an adjusted relative risk.

872

873 The number of intubation attempts will be analyzed using a generalized mixed model with a log-  
874 Poisson distribution to account for the nature of variable (ie, counting with one or more several  
875 intubation attempts by patient).

876 Duration of intubation will also be evaluated using a generalized mixed linear model. The duration  
877 of intubation, the quality of sedation and the time to respiratory and limbs' movements' recovery  
878 will be compared between treatment groups using Kruskal-Wallis tests.

879 The analysis of variations in physiological parameters recorded at the predefined time points will  
880 be performed using a generalized linear model for repeated data including treatment group, time,  
881 time by treatment interaction, baseline parameter value, weight at inclusion ( $\leq 1000\text{g}$ ,  $>1000\text{g}$ ) and  
882 treating center as a random effect (exchangeable within-center correlation structure).

883 A subgroup analysis will be conducted according to weight at inclusion ( $\leq 1000\text{g}$ ,  $>1000\text{g}$ ).

884 No interim analysis is planned, the study being based on pre-defined stopping rules.

885

886

## 887 **Sample size**

888

889 If one wants to show that the frequency of children showing at least one desaturation decreases  
890 significantly from 50% to 30% assuming a 2-sided  $\alpha$  error of .05 and a power of 0.8, 93 children  
891 per group are required, ie 186 children in total .

892 Given that 40% of children should weight less than 1000 g and 60% more than 2000 g, 37 and 56  
893 children in each group should be included in each stratum: for 5 participating centers, this would  
894 result in 8 children per group for weights  $\leq 1000$  g and 12 children per group for weights  $> 1000$  g.

895 Taking into account possible withdrawals of consent, recruitment could be carried out by 5 centers  
896 according to the following scheme:

| 897 Center | weight $\leq 1000$ g |   | weight $> 1000$ g |    |
|------------|----------------------|---|-------------------|----|
| 898        | A                    | B | A                 | B  |
| 899 1      | 8                    | 8 | 12                | 12 |
| 900 2      | 8                    | 8 | 12                | 12 |
| 901 3      | 8                    | 8 | 12                | 12 |
| 902 4      | 8                    | 8 | 12                | 12 |
| 903 5      | 8                    | 8 | 12                | 12 |

904

905 which would eventually require 200 children.

## 906 **Expected statistical significance**

907

908 A difference observed between the two groups will be said to be significant if  $p < 0.05$ .

### 909 **Statistical Criteria for Stopping the Research**

910  
911 No interim analysis is planned. The rules for stopping the test are defined in another paragraph.

### 912 **Method for taking account of missing, unnecessary or invalid data**

913  
914 Missing data will not be accounted for.

915

### 916 **Management of changes to the initial strategy analysis plan**

917  
918 Not applicable to this study.

919

### 920 **Choice of subjects to include in analyzes**

921  
922 The analysis will be on an intent-to-treat basis and will include all randomized children, even if  
923 incomplete treatment or ineffective sedation is used.

924

## 925 **Regulatory and Ethical aspects**

926

### 927 **Right of access to data and source documents**

928  
929 Access to data will be authorized for the CRA, the coordinating investigator and the sponsor in  
930 compliance with the rules of medical confidentiality. Direct access to source data will be authorized  
931 by the investigator in the event of an audit by the proponent or representatives of regulatory  
932 authorities.

933 The source documents will be stored in each center in CRFs composed of single sheets. The copy  
934 will be collected by the CRA at each center and the original will be retrieved during the monitoring  
935 visits and stored in the Neonatal Resuscitation and Neonatal Department of CHIC, under lock.

### 936 **Quality control and quality assurance**

937  
938 The completeness, consistency and quality of the data collected will be ensured by the  
939 investigators designated in each center and verified by the CRA. The principal investigator  
940 reserves the right to exclude from the study a center that does not conform to the protocol or does  
941 not ensure correct data collection

### 942 **Ethical Considerations**

943

944 This study will be carried out according to the national ethical rules for minors suitable for  
945 biomedical research. This protocol shall be submitted by the coordinating investigator to the  
946 opinion of the Comité de Protection des Personnes Ile de France III in accordance with the  
947 legislation in France at the start of the trial. Upon receipt of the favorable opinion issued by the  
948 Comité de Protection des Personnes and registration of the study at the General Direction of  
949 Health, the study may begin.

#### 950 *Declaration of Helsinki*

951 This project was developed and will be carried out in accordance with the principles laid down by  
952 the 18th World Medical Assembly in Helsinki in 1964 and their amendments adopted in Tokyo,  
953 Venice, Hong Kong, South Africa and Edinburg - Ethical and legislative texts on Biomedical  
954 Research).

955 It also complies with the legislation in France (Huriet Law No. 88-1138 of 20 December 1988, as  
956 amended, and Public Health Act No. 2004-806 of 9 August 2004) and the "Notice to Promoters  
957 and Investigators clinical trials of medicines "published by the Ministry of Health and Family in  
958 1987 (see Ethical and Legislative Texts on Biomedical Research).

#### 959 **National Agency for Numerical Data Safety (CNIL)**

960  
961 The study is subjected to a declaration to the CNIL, and complies with the criteria for the  
962 methodology of reference.

#### 963 **Data processing and retention of research documents and data**

964  
965 Data processing: CRFs will be sent to ACTIV for validation, and dual input in real time. Requests  
966 for correction on the already monitored CRFs will be edited by ACTIV in the form of queries and  
967 handed over to CRA monitors in case of missing or incorrect data. Following the monitoring visits,  
968 the dated and signed investigator's responses will be entered on the basis, once refastened to  
969 ACTIV.

970 The data will then be treated anonymously by Dr. Dechartres and Mrs Martin-Marchand (INSERM  
971 U 1153), respectively methodologist and statistician appointed for this study.

972 The source documents will be kept in the participating centers and at the CHIC for a period of 15  
973 years.

974 The documents to be kept by the investigator for a period of 15 years are as follows:

- 975 - the final protocol signed by the investigator
- 976 - any amendments to the protocol
- 977 - one copy of the FIU for each patient
- 978 - an information form
- 979 - a patient identification list
- 980 - Completed FIUs (yellow leaflets)
- 981 - his CV together with an original copy of his financial agreement

982 - signed (original) consents

### 983 **Funding and Insurance**

984  
985 Funding for the study is based on funding through PHRC 2009, combined with an accepted  
986 supplement in September 2014. No other funding was requested for this study. The application for  
987 funding included in this study takes into account the cost of medical and paramedical time in all  
988 centers (two full-time equivalents for the entire study), the cost of the CRA and its regular  
989 movements. Regarding drugs, prices were evaluated with the CHIC pharmacy but will be fixed  
990 after the procedure respecting the code of the public contracts. Costs related to the double-blind  
991 procedure (pharmaceutical manufacturers) are based on a detailed quote from Crid Pharma,  
992 Theradis and Baccinex. Pharmacovigilance fees are based on quotes from the company ForDrug  
993 Consulting.  
994 The CRA of each site will ensure data entry. CRC monitors from CHI Créteil will monitor the study.  
995 Insurance has been taken out in accordance with the provisions of article L.1121-10 of the Code of  
996 Public Health. Issue 102.760 by the sponsor to SHAM.

### 997 **Publication rules**

998  
999 The results of this study will be published in an international peer-reviewed English-language  
1000 journal.  
1001 Excluding the first and last author ranks reserved for the coordinating center, the rank will be  
1002 proportional to the number of inclusions for each center. A representative of ACTIV will also be  
1003 among the authors.

### 1004 **Feasibility of the study**

1005  
1006 Each participating center has a high annual recruitment. They all have solid experience in  
1007 multicenter clinical trials. In the prospective study carried out in Creteil's NICU in 2007, 35  
1008 newborns (all gestational ages) were intubated over a period of 6 months (personal data), ie 70  
1009 intubations per year. It can therefore be estimated that in each center - the number of annual  
1010 neonatal admissions is close to that of the CHIC - an average of the lowest of 60 intubations per  
1011 year will be achieved (90 over 18 months). The target of 40 inclusions per center over 18 months  
1012 therefore requires an inclusion rate of 44% in the eligible population. This rate appears to be  
1013 reasonably achievable given the experience of each of the participating centers. In each center, a  
1014 part-time research technician will be allocated to identify eligible patients and provide first  
1015 information to parents of potentially eligible children. These research technicians will also be  
1016 responsible for the quality and completeness of the data collection, the appropriate reporting of  
1017 AEs and SAEs by investigators and the keeping of screening logs. The inclusion rate of each  
1018 center will be evaluated by the weekly collection of all the intubations carried out ("screening log")  
1019 which will be transmitted by fax to the coordinating center. In case of difficulties of inclusion, the

1020 reasons for these difficulties will be discussed with each center and appropriate measures will be  
1021 taken during on-site visits.  
1022 The proper implementation of the study will be ensured by prior visits to each center explaining the  
1023 objectives of the protocol, its conduct, the modeling with training in data collection, the declaration  
1024 of AEs and SAEs and to plan the CRA's visits.  
1025



1027 **References**

- 1028
- 1029 1. Vanlersberghe C, Camu F. Propofol. *Handb Exp Pharmacol*. 2008(182):227-252.
- 1030 2. Bhutta AT, Anand KJ. Vulnerability of the developing brain. Neuronal mechanisms. *Clin*  
1031 *Perinatol*. 2002;29(3):357-372.
- 1032 3. Prevention and management of pain and stress in the neonate. American Academy of  
1033 Pediatrics. Committee on Fetus and Newborn. Committee on Drugs. Section on  
1034 Anesthesiology. Section on Surgery. Canadian Paediatric Society. Fetus and Newborn  
1035 Committee. *Pediatrics*. 2000;105(2):454-461.
- 1036 4. Carbajal R, Rousset A, Danan C, et al. Epidemiology and treatment of painful procedures in  
1037 neonates in intensive care units. *Jama*. 2008;300(1):60-70.
- 1038 5. Anand KJ. Effects of perinatal pain and stress. *Prog Brain Res*. 2000;122:117-129.
- 1039 6. Buskila D, Neumann L, Zmora E, Feldman M, Bolotin A, Press J. Pain sensitivity in  
1040 prematurely born adolescents. *Arch Pediatr Adolesc Med*. 2003;157(11):1079-1082.
- 1041 7. Grunau RE, Whitfield MF, Petrie J. Children's judgements about pain at age 8-10 years: do  
1042 extremely low birthweight (< or = 1000 g) children differ from full birthweight peers? *J Child*  
1043 *Psychol Psychiatry*. 1998;39(4):587-594.
- 1044 8. Stevens B, McGrath P, Gibbins S, et al. Procedural pain in newborns at risk for neurologic  
1045 impairment. *Pain*. 2003;105(1-2):27-35.
- 1046 9. Franck LS, Cox S, Allen A, Winter I. Parental concern and distress about infant pain. *Arch*  
1047 *Dis Child Fetal Neonatal Ed*. 2004;89(1):F71-75.
- 1048 10. Walter-Nicolet E, Flamant C, Negrea M, Parat S, Hubert P, Mitanchez D. [Premedication  
1049 before tracheal intubation in French neonatal intensive care units and delivery rooms]. *Arch*  
1050 *Pediatr*. 2007;14(2):144-149.
- 1051 11. Durrmeyer X, Daoud P, Decobert F, et al. Premedication for neonatal endotracheal  
1052 intubation: results from the epidemiology of procedural pain in neonates study. *Pediatr Crit*  
1053 *Care Med*. 2013;14(4):e169-175.
- 1054 12. Pokela ML, Koivisto M. Physiological changes, plasma beta-endorphin and cortisol  
1055 responses to tracheal intubation in neonates. *Acta Paediatr*. 1994;83(2):151-156.
- 1056 13. Topulos GP, Lansing RW, Banzett RB. The experience of complete neuromuscular  
1057 blockade in awake humans. *J Clin Anesth*. 1993;5(5):369-374.
- 1058 14. Kumar P, Denson SE, Mancuso TJ. Premedication for nonemergency endotracheal  
1059 intubation in the neonate. *Pediatrics*. 2010;125(3):608-615.
- 1060 15. Byrne E, MacKinnon R. Should premedication be used for semi-urgent or elective  
1061 intubation in neonates? *Arch Dis Child*. 2006;91(1):79-83.

- 1062 16. Friesen RH, Honda AT, Thieme RE. Changes in anterior fontanel pressure in preterm  
1063 neonates during tracheal intubation. *Anesth Analg*. 1987;66(9):874-878.
- 1064 17. Millar C, Bissonnette B. Awake intubation increases intracranial pressure without affecting  
1065 cerebral blood flow velocity in infants. *Can J Anaesth*. 1994;41(4):281-287.
- 1066 18. Carbajal R, Eble B, Anand KJ. Premedication for tracheal intubation in neonates: confusion  
1067 or controversy? *Semin Perinatol*. 2007;31(5):309-317.
- 1068 19. Bhutada A, Sahni R, Rastogi S, Wung JT. Randomised controlled trial of thiopental for  
1069 intubation in neonates. *Arch Dis Child Fetal Neonatal Ed*. 2000;82(1):F34-37.
- 1070 20. Attardi DM, Paul DA, Tuttle DJ, Greenspan JS. Premedication for intubation in neonates.  
1071 *Arch Dis Child Fetal Neonatal Ed*. 2000;83(2):F161.
- 1072 21. Lemyre B, Doucette J, Kalyn A, Gray S, Marrin ML. Morphine for elective endotracheal  
1073 intubation in neonates: a randomized trial [ISRCTN43546373]. *BMC Pediatr*. 2004;4:20.
- 1074 22. Roberts KD, Leone TA, Edwards WH, Rich WD, Finer NN. Premedication for nonemergent  
1075 neonatal intubations: a randomized, controlled trial comparing atropine and fentanyl to  
1076 atropine, fentanyl, and mivacurium. *Pediatrics*. 2006;118(4):1583-1591.
- 1077 23. Duncan HP, Zurick NJ, Wolf AR. Should we reconsider awake neonatal intubation? A  
1078 review of the evidence and treatment strategies. *Paediatr Anaesth*. 2001;11(2):135-145.
- 1079 24. Gepts E, Camu F, Cockshott ID, Douglas EJ. Disposition of propofol administered as  
1080 constant rate intravenous infusions in humans. *Anesth Analg*. 1987;66(12):1256-1263.
- 1081 25. Keaveny JP, Knell PJ. Intubation under induction doses of propofol. *Anaesthesia*. 1988;43  
1082 Suppl:80-81.
- 1083 26. Silvestri GA, Vincent BD, Wahidi MM, Robinette E, Hansbrough JR, Downie GH. A Phase  
1084 3, Randomized, Double-blind, Study to Assess the Efficacy and Safety of Fospropofol  
1085 Disodium Injection for Moderate Sedation in Patients Undergoing Flexible Bronchoscopy.  
1086 *Chest*. 2008.
- 1087 27. Lightdale JR, Mahoney LB, Schwarz SM, Liacouras CA. Methods of sedation in pediatric  
1088 endoscopy: a survey of NASPGHAN members. *J Pediatr Gastroenterol Nutr*.  
1089 2007;45(4):500-502.
- 1090 28. Hamard F, Ferrandiere M, Sauvagnac X, et al. [Propofol sedation allows awake intubation  
1091 of the difficult airway with the Fastrach LMA]. *Can J Anaesth*. 2005;52(4):421-427.
- 1092 29. Fan SZ, Lee TS, Chen LK, et al. Long-term propofol infusion and airway management in a  
1093 patient with Goldenhar's syndrome. *Acta Anaesthesiol Sin*. 1995;33(4):233-236.
- 1094 30. Ebert TJ. Sympathetic and hemodynamic effects of moderate and deep sedation with  
1095 propofol in humans. *Anesthesiology*. 2005;103(1):20-24.
- 1096 31. Mather LE, Duke CC, Ladd LA, Copeland SE, Gallagher G, Chang DH. Direct cardiac  
1097 effects of coronary site-directed thiopental and its enantiomers: a comparison to propofol in  
1098 conscious sheep. *Anesthesiology*. 2004;101(2):354-364.

- 1099 32. Vespasiano M, Finkelstein M, Kurachek S. Propofol sedation: intensivists' experience with  
1100 7304 cases in a children's hospital. *Pediatrics*. 2007;120(6):e1411-1417.
- 1101 33. Crawford MW, Rohan D, Macgowan CK, Yoo SJ, Macpherson BA. Effect of propofol  
1102 anesthesia and continuous positive airway pressure on upper airway size and configuration  
1103 in infants. *Anesthesiology*. 2006;105(1):45-50.
- 1104 34. Barbi E, Gerarduzzi T, Marchetti F, et al. Deep sedation with propofol by  
1105 nonanesthesiologists: a prospective pediatric experience. *Arch Pediatr Adolesc Med*.  
1106 2003;157(11):1097-1103.
- 1107 35. Kang TM. Propofol infusion syndrome in critically ill patients. *Ann Pharmacother*.  
1108 2002;36(9):1453-1456.
- 1109 36. Abboud TK, Zhu J, Richardson M, Peres Da Silva E, Donovan M. Intravenous propofol vs  
1110 thiamylal-isoflurane for caesarean section, comparative maternal and neonatal effects. *Acta*  
1111 *Anaesthesiol Scand*. 1995;39(2):205-209.
- 1112 37. Gin T, O'Meara ME, Kan AF, Leung RK, Tan P, Yau G. Plasma catecholamines and  
1113 neonatal condition after induction of anaesthesia with propofol or thiopentone at caesarean  
1114 section. *Br J Anaesth*. 1993;70(3):311-316.
- 1115 38. Ikonomidou C, Stefovskaja V, Turski L. Neuronal death enhanced by N-methyl-D-aspartate  
1116 antagonists. *Proc Natl Acad Sci U S A*. 2000;97(23):12885-12890.
- 1117 39. Al-Jahdari WS, Saito S, Nakano T, Goto F. Propofol induces growth cone collapse and  
1118 neurite retractions in chick explant culture. *Can J Anaesth*. 2006;53(11):1078-1085.
- 1119 40. Vutskits L, Gascon E, Tassonyi E, Kiss JZ. Clinically relevant concentrations of propofol but  
1120 not midazolam alter in vitro dendritic development of isolated gamma-aminobutyric acid-  
1121 positive interneurons. *Anesthesiology*. 2005;102(5):970-976.
- 1122 41. Engelhard K, Werner C, Eberspacher E, et al. Influence of propofol on neuronal damage  
1123 and apoptotic factors after incomplete cerebral ischemia and reperfusion in rats: a long-  
1124 term observation. *Anesthesiology*. 2004;101(4):912-917.
- 1125 42. Murphy PG, Bennett JR, Myers DS, Davies MJ, Jones JG. The effect of propofol  
1126 anaesthesia on free radical-induced lipid peroxidation in rat liver microsomes. *Eur J*  
1127 *Anaesthesiol*. 1993;10(4):261-266.
- 1128 43. Cheng YJ, Wang YP, Chien CT, Chen CF. Small-dose propofol sedation attenuates the  
1129 formation of reactive oxygen species in tourniquet-induced ischemia-reperfusion injury  
1130 under spinal anesthesia. *Anesth Analg*. 2002;94(6):1617-1620, table of contents.
- 1131 44. Basu S, Mutschler DK, Larsson AO, Kiiski R, Nordgren A, Eriksson MB. Propofol (Diprivan-  
1132 EDTA) counteracts oxidative injury and deterioration of the arterial oxygen tension during  
1133 experimental septic shock. *Resuscitation*. 2001;50(3):341-348.
- 1134 45. Rodriguez-Lopez JM, Sanchez-Conde P, Lozano FS, et al. Laboratory investigation: effects  
1135 of propofol on the systemic inflammatory response during aortic surgery. *Can J Anaesth*.  
1136 2006;53(7):701-710.

- 1137 46. Brookes ZL, Reilly CS, Lawton BK, Brown NJ. Intravenous anesthesia inhibits leukocyte-  
1138 endothelial interactions and expression of CD11b after hemorrhage. *Shock*.  
1139 2006;25(5):492-499.
- 1140 47. Chen HI, Hsieh NK, Kao SJ, Su CF. Protective effects of propofol on acute lung injury  
1141 induced by oleic acid in conscious rats. *Crit Care Med*. 2008;36(4):1214-1221.
- 1142 48. Durrmeyer X, Vutskits L, Anand KJ, Rimensberger PC. Use of analgesic and sedative  
1143 drugs in the NICU: integrating clinical trials and laboratory data. *Pediatr Res*.  
1144 2010;67(2):117-127.
- 1145 49. Gascon E, Klauser P, Kiss JZ, Vutskits L. Potentially toxic effects of anaesthetics on the  
1146 developing central nervous system. *Eur J Anaesthesiol*. 2007;24(3):213-224.
- 1147 50. Durrmeyer X, Dahan S, Delorme P, et al. Assessment of atropine-sufentanil-atracurium  
1148 anaesthesia for endotracheal intubation: an observational study in very premature infants.  
1149 *BMC Pediatrics*. 2014;14(1):120.
- 1150 51. Ghanta S, Abdel-Latif ME, Lui K, Ravindranathan H, Awad J, Oei J. Propofol compared  
1151 with the morphine, atropine, and suxamethonium regimen as induction agents for neonatal  
1152 endotracheal intubation: a randomized, controlled trial. *Pediatrics*. 2007;119(6):e1248-  
1153 1255.
- 1154 52. Fahnenstich H, Steffan J, Kau N, Bartmann P. Fentanyl-induced chest wall rigidity and  
1155 laryngospasm in preterm and term infants. *Crit Care Med*. 2000;28(3):836-839.
- 1156 53. Papoff P, Mancuso M, Caresta E, Moretti C. Effectiveness and safety of propofol in  
1157 newborn infants. *Pediatrics*. 2008;121(2):448; author reply 448-449.
- 1158 54. Welzing L, Kribs A, Eifinger F, Huenseler C, Oberthuer A, Roth B. Propofol as an induction  
1159 agent for endotracheal intubation can cause significant arterial hypotension in preterm  
1160 neonates. *Paediatr Anaesth*. 2010;20(7):605-611.
- 1161 55. Simons SH, van der Lee R, Reiss IK, van Weissenbruch MM. Clinical evaluation of propofol  
1162 as sedative for endotracheal intubation in neonates. *Acta Paediatr*. 2013;102(11):e487-492.
- 1163 56. Layouni I, Zana E, Danan C, d'Athis P, Durrmeyer X. Prospective evaluation of propofol as  
1164 premedication for endotracheal intubation of infants above 32 weeks corrected age: focus  
1165 on tolerance. 20th ESPNIC Medical & Nursing Annual Congress 2009; 2009; Verona, Italy.
- 1166 57. Nuntnarumit P, Yang W, Bada-Ellzey HS. Blood pressure measurements in the newborn.  
1167 *Clin Perinatol*. 1999;26(4):981-996, x.
- 1168 58. Kluckow M, Evans N. Relationship between blood pressure and cardiac output in preterm  
1169 infants requiring mechanical ventilation. *J Pediatr*. 1996;129(4):506-512.
- 1170 59. Hunt RW, Evans N, Rieger I, Kluckow M. Low superior vena cava flow and  
1171 neurodevelopment at 3 years in very preterm infants. *J Pediatr*. 2004;145(5):588-592.
- 1172 60. Loepke AW, McGowan FX, Jr., Soriano SG. CON: The toxic effects of anesthetics in the  
1173 developing brain: the clinical perspective. *Anesth Analg*. 2008;106(6):1664-1669.

- 1174 61. Roze JC, Denizot S, Carbajal R, et al. Prolonged sedation and/or analgesia and 5-year  
1175 neurodevelopment outcome in very preterm infants: results from the EPIPAGE cohort. *Arch*  
1176 *Pediatr Adolesc Med.* 2008;162(8):728-733.
- 1177 62. Lerman J, Chinyanga HM. The heart rate response to succinylcholine in children: a  
1178 comparison of atropine and glycopyrrolate. *Can Anaesth Soc J.* 1983;30(4):377-381.
- 1179 63. Marshall TA, Deeder R, Pai S, Berkowitz GP, Austin TL. Physiologic changes associated  
1180 with endotracheal intubation in preterm infants. *Crit Care Med.* 1984;12(6):501-503.
- 1181 64. Meyer S, Gottschling S, Gortner L. Propofol Compared With the Morphine, Atropine, and  
1182 Suxamethonium Regimen as Induction Agents for Neonatal Endotracheal Intubation: A  
1183 Randomized, Controlled Trial. *Pediatrics.* 2007;120(4):932-933.
- 1184 65. Allegaert K, Peeters MY, Verbesselt R, et al. Inter-individual variability in propofol  
1185 pharmacokinetics in preterm and term neonates. *Br J Anaesth.* 2007;99(6):864-870.
- 1186 66. Hall ID, Leiman BC. Atracurium in neonatal anaesthesia. *Can Anaesth Soc J.*  
1187 1985;32(4):453-454.
- 1188 67. Nightingale DA. Use of atracurium in neonatal anaesthesia. *Br J Anaesth.* 1986;58 Suppl  
1189 1:32S-36S.
- 1190 68. Meakin G, Shaw EA, Baker RD, Morris P. Comparison of atracurium-induced  
1191 neuromuscular blockade in neonates, infants and children. *Br J Anaesth.* 1988;60(2):171-  
1192 175.
- 1193 69. Meretoja OA, Wirtavuori K. Influence of age on the dose-response relationship of  
1194 atracurium in paediatric patients. *Acta Anaesthesiol Scand.* 1988;32(8):614-618.
- 1195 70. Clarkson A, Choonara I, Martin P. Suspected toxicity of atracurium in the neonate. *Paediatr*  
1196 *Anaesth.* 2001;11(5):631-632.
- 1197 71. Seguin JH, Erenberg A, Leff RD. Safety and efficacy of sufentanil therapy in the ventilated  
1198 infant. *Neonatal Netw.* 1994;13(4):37-40.
- 1199 72. Nguyen The Tich S, Vecchierini MF, Debillon T, Pereon Y. Effects of sufentanil on  
1200 electroencephalogram in very and extremely preterm neonates. *Pediatrics.*  
1201 2003;111(1):123-128.
- 1202 73. Anand KJS, Hickey PR. Halothane–Morphine Compared with High-Dose Sufentanil for  
1203 Anesthesia and Postoperative Analgesia in Neonatal Cardiac Surgery. *New England*  
1204 *Journal of Medicine.* 1992;326(1):1-9.
- 1205 74. Sahni R, Gupta A, Ohira-Kist K, Rosen TS. Motion resistant pulse oximetry in neonates.  
1206 *Arch Dis Child Fetal Neonatal Ed.* 2003;88(6):F505-508.
- 1207 75. Skellern CY, Rogers Y, O'Callaghan MJ. A parent-completed developmental questionnaire:  
1208 follow up of ex-premature infants. *J Paediatr Child Health.* 2001;37(2):125-129.
- 1209 76. Hans P, Brichant JF, Hubert B, Dewandre PY, Lamy M. Influence of induction of  
1210 anaesthesia on intubating conditions one minute after rocuronium administration:  
1211 comparison of ketamine and thiopentone. *Anaesthesia.* 1999;54(3):276-279.

1212 77. Cooper R, Mirakhur RK, Clarke RS, Boules Z. Comparison of intubating conditions after  
1213 administration of Org 9246 (rocuronium) and suxamethonium. *Br J Anaesth*.  
1214 1992;69(3):269-273.  
1215
